# Supplementary material for: Lithium-promoted hydrogenation of carbon dioxide to formates by heterobimetallic hydridozinc alkoxideclusters
Source: Royal Society of Chemistry journal article supplement (doi:10.1039/b714806b), 2007-12-13
Supplement: b714806b.pdf [file b714806b.pdf]

## Lithium-Promoted Hydrogenation of Carbon Dioxide to Formates by Heterobimetallic Hydrido Zinc Alkoxide Clusters

Klaus Merz,<sup>a</sup> Mariluna Moreno,<sup>a</sup> Elke Löffler,<sup>a</sup> Lamy Khodeir,<sup>a</sup> Andre Rittermeier,<sup>a</sup> Karin Fink,<sup>b</sup> Konstantinos Kotsis,<sup>a</sup> Martin Muhler<sup>a</sup> and Matthias Driess<sup>\*c</sup>

<sup>a</sup> Faculty of Chemistry, Ruhr-University Bochum, Universitätsstrasse 150, D-44780 Bochum. <sup>b</sup>Institute of Nanotechnology, Forschungszentrum Karlsruhe, PO Box 3640, D-76021 Karlsruhe. <sup>c</sup>Technische Universität Berlin, Institute of Chemistry: Metalorganics and Inorganic Materials, Sekr. C2, Strasse des 17. Juni 135, D-10623 Berlin, Germany. Fax: +49(0)30-314-29732 Tel: +49(0)30-314-29731; E-mail: [matthias.driess@tu-berlin.de](mailto:matthias.driess@tu-berlin.de)

General Considerations: All manipulations were carried out under anaerobic conditions in dry argon using standard Schlenk techniques. Solvents were refluxed over an appropriate drying agent, and distilled and degassed prior to use. NMR spectra were recorded on a BrukerAvance 250 (250.1 MHz (1H)), Bruker ARX200 (200 MHz (1H)) and Bruker DRX400 (400 MHz (1H)) spectrometers at ambient temperature.

IR Measurements: The in situ CO<sub>2</sub> adsorption studies in solution were performed on a Nicolet FTIR spectrometer equipped with a home made glass reactor connected to an IR liquid cell with NaCl windows. The spectra were run at room temperature at a spectral resolution of 4 cm<sup>-1</sup> accumulating 20 scans. A concentrated solution of the nanocomposite in toluene was transferred under inert atmosphere in the glass reactor and was circulated continuously through the liquid cell. The flow rates of the gases passing through the solution were 25 ml/min.

Formation of [Zn(HCO<sub>2</sub>)<sub>2</sub>·2H<sub>2</sub>O] in solution: A solution of [(HZnOtBu)<sub>3</sub>(thf·LiOtBu)] **1b** (0.25 g, 0.43 mmol) in ca. 20 mL THF was treated with CO<sub>2</sub> for 20 min at room temperature and stirred at this temperature for 1 h. The volatile components of the solution were removed in vacuo. Colourless crystals suitable for X-ray diffraction were isolated after recrystallization of the residue in THF at -30°C. Yield: 0.3 g (1.2 mmol, 98%); IR: 3436 cm<sup>-1</sup> (O-H), 2970 cm<sup>-1</sup>, 2869 cm<sup>-1</sup> und 2736 cm<sup>-1</sup> (C-H), vs 1608 cm<sup>-1</sup> and vs 1376 cm<sup>-1</sup> (HCOO). <sup>1</sup>H NMR

(298 K, 250.1 MHz, D<sub>2</sub>O):  $\delta = 8.26$  ppm (s) ; <sup>13</sup>C{<sup>1</sup>H}-NMR (298 K, 62.9 MHz, D<sub>2</sub>O):  $\delta = 173.9$  ppm.

Crystal data for C<sub>2</sub>H<sub>6</sub>O<sub>6</sub>Zn,  $M_r=191.44$ , monoclinic, space group  $P2_1/c$  (No. 14),  $a = 8.6803(9)$ ,  $b = 7.1241(10)$ ,  $c = 9.3060(12)$  Å,  $\beta = 97.664(3)^\circ$ ,  $V = 570.3(1)$  Å<sup>3</sup>,  $\rho_{\text{calcd}} = 2.229$  g cm<sup>-3</sup>,  $\mu = 4.265$  mm<sup>-1</sup>,  $Z = 4$ ,  $\lambda = 0.71073$  Å,  $T = 213$  K, 209 reflections collected ( $\pm h, \pm k, \pm l$ ), [ $\Theta$  range: 3.71 to 25.02], 926 independent ( $R_{\text{int}}=0.019$ ) and 734 observed reflections [ $I > 2\sigma(I)$ ], 110 refined parameters,  $R = 0.022$ ,  $wR_2 = 0.062$ . CCDC-650772 contains the supplementary crystallographic data for this paper. These data can be obtained free of charge from The Cambridge Crystallographic Data Centre via [www.ccdc.cam.ac.uk/data\\_request/cif](http://www.ccdc.cam.ac.uk/data_request/cif).

Quantum Chemical Calculations and assignment of vibration bands: The assignments of characteristic vibration modes of the formate ion is based on quantum chemical calculations. The calculations were performed with the program package Turbomole.<sup>1</sup> The geometries were optimized at the DFT level employing the resolution of identity approach<sup>2</sup> and using the BP functional.<sup>3</sup> A TZVP basis set was used for all atoms besides the C(CH<sub>3</sub>)<sub>3</sub> groups and for tetrahydrofuran. Here, the basis set was reduced to DZ. From test calculations on smaller molecules like H<sub>2</sub>O, HCOO<sup>-</sup>, and HCOOH, we estimate an accuracy for the vibration frequencies of about 30 cm<sup>-1</sup> compared to the experimental values.<sup>4</sup> The relative shifts of comparable vibrations, like Zn-H, in different compounds, should be even more accurate. The two different conformers **A** and **B** of the hypothetical initial products [**1a** + CO<sub>2</sub>] and [**1b** + CO<sub>2</sub>] have been considered (Fig. 1). Conformer **B** has stronger binding energies of 0.477 eV for **1a-B** and 0.533 eV for **1b-B**, respectively. From literature it is known that formate can adopt symmetric chelating. We observed for the hypothetical insertion product **1a+CO<sub>2</sub>**, that the potential energy surface is very flat with respect to the change between the symmetric and the monodentate form. The energy of a symmetric HCO<sub>2</sub> group is only 0.01 eV higher than the energy of **1a-B**.

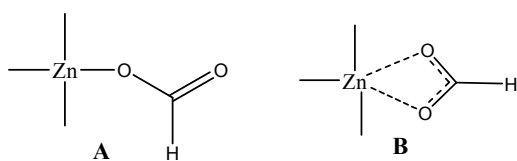

Fig. 1: Coordination modes of postulated formate species from the initial insertion of CO<sub>2</sub> into the Zn-H bond of **1a** and **1b**, respectively.

Tab.1. Experimental and calculated values for selected stretching vibration modes.

a) Experimental

|                             | $\nu(\text{ZnH})$ | $\nu_{\text{as}}(\text{HCO}_2)$ | $\nu_{\text{s}}(\text{HCO}_2)$ | $\nu(\text{HCO}_2)$ |
|-----------------------------|-------------------|---------------------------------|--------------------------------|---------------------|
| <b>1a</b>                   | 1796-1813         | -                               | -                              | -                   |
| <b>1b</b>                   | 1769              | -                               | -                              | -                   |
| <b>1a</b> + CO <sub>2</sub> | 1798-1813         | 1650-1600                       | 1331                           | 2700-2800           |
| <b>1b</b> + CO <sub>2</sub> | 1769,1793         | 1659-1633                       | 1330                           | 2700-2800           |

b) Calculated

|                                       |   | $\nu(\text{ZnH})$  | $\nu_{\text{as}}(\text{HCO}_2)$ | $\nu_{\text{s}}(\text{HCO}_2)$ | $\nu(\text{HCO}_2)$ |
|---------------------------------------|---|--------------------|---------------------------------|--------------------------------|---------------------|
| <b>1a</b>                             |   | 1809,1810,<br>1815 |                                 |                                |                     |
| <b>1b</b>                             |   | 1777,1780,<br>1786 |                                 |                                |                     |
| <b>1a</b><br>+CO <sub>2</sub>         | A | 1826,1830          | 1710                            | 1203                           | 2758                |
| <b>1b</b><br>+CO <sub>2</sub>         | B | 1821, 1826         | 1638                            | 1248                           | 2893                |
| <b>1a</b><br>+CO <sub>2</sub><br>sym. | B | 1815,1819          | 1553                            | 1341<br>(1285)                 | 2960                |
| <b>1b</b><br>+CO <sub>2</sub>         | A | 1798,1800          | 1701                            | 1214                           | 2772                |
| <b>1b</b><br>+CO <sub>2</sub>         | B | 1788, 1797         | 1645                            | 1249                           | 2868                |

In Figure 1 the calculated stretching frequencies of the different coordination modes for the postulated HCO<sub>2</sub> species from the reaction of **2** with CO<sub>2</sub> and the experimental stretching

frequencies are compared to a selection of literature values for zinc formate. Table 1 shows the comparison between the experimental data a) and the theoretical values b) for the reactions of **1** and **2** with CO<sub>2</sub>.

The experimentally observed shift in the Zn-H stretching frequencies between compound **1** and **2** is well reproduced in the calculations. An unequivocal assignment of the formate species to one or more of the HCO<sub>2</sub> coordination modes took shape with difficulty. The experimentally observed C-H stretching frequency between 2700 and 2800 cm<sup>-1</sup> is in good agreement with the calculated values for conformer A. The respecting CO stretching frequencies  $\nu_s(\text{OCO})$  and  $\nu_{as}(\text{OCO})$  are in the same region as solvent bands. The situation for conformer B is just reverse. While the CH frequency should be covered by other vibrations, the CO stretching frequencies should be observable. The difference between a symmetric and an asymmetric chelating mode may be derived from the difference  $\Delta\nu$  of  $\nu_s(\text{OCO})$  and  $\nu_{as}(\text{OCO})$ . In general the observed difference is smaller for symmetric chelating modes than for asymmetric chelating modes. The obtained  $\nu_s(\text{HCO}_2)$  frequencies in the 1633-1659 cm<sup>-1</sup> region are postulated to apply to the conformer B. Here, it has to be considered, that the energies of the symmetric and the asymmetric form of B are almost identical, while the vibration modes are strongly influenced by small changes in the geometry. Our conclusion is, that both conformers A and B contribute to the vibration spectra.

---

<sup>1</sup> R. Ahlrichs, M. Bär, M. Häser, H. Horn, C. Kölmel, Chem. Phys. Lett. **1989**, 162, 165-169.

<sup>2</sup> K. Eichkorn, O. Treutler, H. Öhm, M. Häser, R. Ahlrichs, Chem. Phys. Lett. **1995**, 240, 283-289,  
K. Eichkorn, O. Treutler, H. Öhm, M. Häser, R. Ahlrichs, Chem. Phys. Lett. **1995**, 242, 652-660.

<sup>3</sup> S.H. Vosko, L. Wilk, M. Nusair, Can. J. Phys. **1980**, 58, 1200-1211.

A.D. Becke, Phys. Rev. A **1988**, 38, 3098-3100,  
J. P. Perdew, Phys. Rev. B **1986**, 33, 8822-8824.

<sup>4</sup> G. Herzberg, Electronic spectra of polyatomic molecules, Molecular spectra and molecular structure III. Electronic spectra and electronic structure of polyatomic molecules **1967** van Nostrand Company.
